# Supplementary material for: DebrisInterMixing-2.3: a finite volume solver for three-dimensional debris-flow simulations with two calibration parameters – Part 2: Model validation with experiments
Source: Copernicus journal article supplement (doi:10.5194/gmd-10-3963-2017), 2017-11-03
Supplement: Supplementary file [file gmd-10-3963-2017-supplement-title-page.pdf › gmd-10-3963-2017-supplement-title-page.pdf]

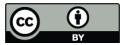

## *Supplement of*

# **DebrisInterMixing-2.3: a finite volume solver for three-dimensional debris-flow simulations with two calibration parameters – Part 2: Model validation with experiments**

**Albrecht von Boetticher et al.**

*Correspondence to:* Albrecht von Boetticher ([albrecht.vonboetticher@usys.ethz.ch](mailto:albrecht.vonboetticher@usys.ethz.ch))

- [gmd-10-3963-2017-supplement-title-page.pdf](#)
- supplement
  - .DS\_Store
  - .\_DS\_Store
  - README.pdf
  - applications
    - \* README.pdf
    - \* run
    - \* solvers
    - \* transportModels

The copyright of individual parts of the supplement might differ from the CC BY 3.0 License.
